# Supplementary material for: Effect of Basic Promoters on Porous Supported Alumina Catalysts for Acetins Production
Source: MDPI journal article supplement (doi:10.3390/catal12121616), 2022-12-09
Supplement: s1 [file s1]

Archive with 1 entries (1 files):
- catalysts-2030704-supplementary.pdf
